1 **Postmating reproductive barriers contribute to the incipient sexual isolation of**  
2 **US and Caribbean *Drosophila melanogaster***

3

4 **Joyce Y. Kao<sup>1,2</sup>, Seana Lymer<sup>2</sup>, Sea H. Hwang<sup>1</sup>, Albert Sung<sup>1</sup>, Sergey V. Nuzhdin<sup>1</sup>**

5 <sup>1</sup>Section of Molecular and Computational Biology, Department of Biology, University of  
6 Southern California, Los Angeles, CA 90089, USA

7 <sup>2</sup>Department of Biology, New York University, 29 Washington Pl, New York, NY 10003,  
8 USA

9

10 Contact Information:

11 Joyce Kao (joycekao@usc.edu), Sergey Nuzhdin (snuzhdin@usc.edu) . 1050 Childs  
12 Way, Los Angeles, CA, USA 90089-2910. Telephone: (+1) 213-740-3065

13

14 **Running title: Postmating barriers and admixture**

15 **Abstract**

16 The nascent stages of speciation start with the emergence of sexual isolation.  
17 Understanding the influence of reproductive barriers in this evolutionary process is an  
18 ongoing effort. We present a study of *Drosophila melanogaster* populations from the  
19 southeast United States and Caribbean islands undergoing incipient sexual isolation.  
20 The existence of premating reproductive barriers have been previously established, but  
21 these types of barriers are not the only source shaping sexual isolation. To assess the  
22 influence of postmating barriers, we investigated putative postmating barriers of female  
23 remating and egg laying behavior, as well as hatchability of eggs laid and female  
24 longevity after mating. In the central region of our putative hybrid zone of American and  
25 Caribbean populations, we observed lower hatchability of eggs laid accompanied by  
26 increased resistance to harm after mating to less related males. These results illustrate  
27 that postmating reproductive barriers acting alongside premating barriers in a complex  
28 secondary contact zone. Furthermore, our findings suggest hybrid incompatibilities,  
29 likely due to the nature of genomic admixture of populations in the area, are influential  
30 even at the early phases of sexual isolation.

31

32 **Running Title**

33 **Postmating barriers in US and Caribbean fruit flies**

34

35 **Key Words**

36 **sexual conflict, egg laying, hatchability, remating, sperm toxicity, chase away**  
37 **selection**



39 **Introduction**

40 The onset of speciation is driven by reproductive barriers that reduce gene flow and  
41 result in reproductive isolation between populations. These barriers are classified by the  
42 temporal nature of their effect: prezygotic barriers occur before fertilization, while  
43 postzygotic barriers occur after fertilization (Coyne & Orr, 2004). The latter can be  
44 further divided into extrinsic and intrinsic categories, depending on whether the barrier  
45 interacts with external factors (e.g. environmental, individuals) or internal factors (e.g.  
46 genetic incompatibilities) (Seehausen *et al.*, 2014). Speciation involves multiple  
47 reproductive barriers of varying effect sizes (Coyne & Orr, 2004; Seehausen *et al.*,  
48 2014), and identifying the interaction and strengths of reproductive barriers at play is  
49 vital to characterizing the process of speciation.

50

51 *Drosophila* is particularly well-suited to study reproductive barriers because this genus  
52 spans the whole speciation spectrum, from non-interbreeding species to hybridizing  
53 species (Bono & Markow, 2009) and populations (Yukilevich & True, 2008b). Empirical  
54 studies of sexual selection in *D. melanogaster* have investigated the evolution of  
55 prezygotic isolation - mate choice, male morphology, and courtship behavior (Hollocher,  
56 1997; Yukilevich & True, 2008a). Postzygotic barrier mechanisms are also known to  
57 have an influence in *Drosophila*, but these studies have been limited to the hybridizing  
58 species *D. mojavensis*/*D. arizonae* (Bono & Markow, 2009) and *D. melanogaster*/*D.*  
59 *simulans* (Matute *et al.*, 2014).

60

61 Many natural forces influence the development of reproductive barriers; one example is

62 sexual conflict, derived from the competing reproductive interests between males and  
63 females (Parker, 1979). Males may benefit from overriding the mating preferences  
64 evolved by females, and females consequently evolve resistance to these male  
65 'coercion' tactics (Holland & Rice, 1998). Males are then selected for novel or more  
66 exaggerated traits - perpetuating an endless evolutionary chase between the sexes  
67 (Parker, 1979; Civetta & Singh, 1995; Rice, 1996; Chapman *et al.*, 2003; Arnqvist &  
68 Rowe, 2005; Arbuthnott *et al.*, 2014). This phenomenon of conflict in reproductive  
69 optima has been experimentally demonstrated to promote an antagonistic male-female  
70 coevolution that is the essence of sexual isolation which precedes speciation (Parker,  
71 1979; Holland & Rice, 1998; Chapman *et al.*, 2003).

72  
73 In *Drosophila melanogaster*, male sperm consists of accessory gland proteins that  
74 reduce female remating rates and increase egg laying (Chapman *et al.*, 2003; Wolfner,  
75 1997). Reduced receptivity to remating will also decrease the female's opportunity to  
76 mate with another male that could result in fitter progeny. Increased egg laying and the  
77 trauma from mating reduces female lifespan (Fowler & Partridge, 1989). As a result,  
78 females develop resistance to these harmful male traits, and males subsequently evolve  
79 new methods to discourage females from mating with other males (Arnqvist & Rowe,  
80 2005). It has been suggested that females should be more resistant to males they have  
81 coevolved with ('homotypic') compared to males they have not coevolved with  
82 ('heterotypic'). However, these effects vary across populations, and ecological context  
83 appears to be a factor (Arbuthnott *et al.*, 2014). This rapid, cyclical process termed  
84 sexually antagonistic coevolution has been demonstrated not only in *Drosophila* species

85 (Knowles & Markow, 2001), but also in other organisms like water striders (Rowe &  
86 Arnqvist, 2002). Coevolution by sexual conflict is a strong force behind reproductive  
87 isolation, which may lead to speciation in specific circumstances (Martin & Hosken,  
88 2003).

89

90 Furthermore, the evolution of Dobzhansky-Muller incompatibilities (DMIs) between  
91 populations is known to promote speciation. Neutral allelic substitution within a  
92 population can be incompatible with loci of a divergent population, and these  
93 incompatibilities are thought to be generated by various forms of genomic conflict  
94 (Seehausen *et al.*, 2014). Negative epistasis reduces the overall viability and sterility of  
95 their hybrids, acting as a powerful force underlying incipient reproductive isolation.

96

97 A powerful approach to understanding the strength and dynamics of postzygotic  
98 isolation is the study of hybrid zones, regions where divergent populations interbreed  
99 and produce offspring (Harrison, 1990; Harrison, 1993). A secondary hybrid zone  
100 emerges when two genetically and geographically distinct populations interbreed after  
101 expansion or migration (Jiggins & Mallet, 2000). One striking example of a secondary  
102 hybrid zone has been discovered in the Caribbean Islands and southeastern United  
103 States. In this region, two distinct populations of *D. melanogaster*, originating from west  
104 Africa and Europe (Kao *et al.*, 2014; Yukilevich *et al.*, 2010), have recently come into  
105 secondary contact (Bergland *et al.*, 2014). After a migration event from Africa to current  
106 day Europe, these populations have been evolving in allopatry for approximately 10,000  
107 to 15,000 years (Capy *et al.*, 1986). Secondary contact occurred in two waves, first with

108 west African flies migrating to the Caribbean Islands during the transatlantic slave trade  
109 400 to 500 years ago, and then the European flies arriving to the east coast US with  
110 European colonists <200 years ago (Capy *et al.*, 1986; Duchen *et al.*, 2013).

111  
112 Caribbean populations have peculiar morphological, behavioral, and pheromonal  
113 differences. They display exceptional African-like morphology based on body size,  
114 allozyme frequencies, hydrocarbon composition, and sequence variation (Kao *et al.*,  
115 2014; Capy *et al.*, 1986; Caracristi & Schlotterer, 2003; Yukilevich & True, 2008a).  
116 Sequence data suggest that United States flies display higher proportion of African  
117 alleles than do European flies, suggesting Caribbean populations as a potential source  
118 of African alleles introgression for North America populations (Kao *et al.* 2014;  
119 Yukilevich *et al.*, 2010; Caracristi & Schlotterer, 2003; Yukilevich & True, 2008b; Capy  
120 *et al.*, 1986). Mating preferences and other premating/prezygotic reproductive barriers  
121 have been formally treated in this system showing partial sexual isolation between west  
122 African flies and American flies, but not Caribbean flies and male courtship behavior  
123 differing between American and Caribbean flies (Yukilevich & True 2008a, b). However,  
124 the presence of postmating sexual isolation in these American and Caribbean  
125 populations remains unexplored.

126  
127 Our study aims to explore the role of postmating reproductive barriers in a *Drosophila*  
128 *melanogaster* secondary contact hybrid zone and to better understand how patterns of  
129 postmating barriers reflect the colonization history of fly populations in the area. We  
130 have investigated the role of remating, female egg laying, hatchability of laid eggs, and

131 female longevity after mating with different males as putative postmating reproductive  
132 barriers. These phenotypes are good candidates for assaying the roles of extrinsic and  
133 intrinsic postmating reproductive barriers. We measured each of these phenotypes in  
134 females from different locations in the southeastern US and Caribbean islands to  
135 examine them for geographical patterns – which may reveal if and how these barriers  
136 affect this secondary contact zone of *Drosophila melanogaster* and by investigating  
137 these barriers, we provide insight into how these mechanisms of speciation function in a  
138 genetically admixed system.

139

## 140 **Materials and Methodology**

### 141 *Fly Lines and Rearing Conditions*

142 For our phenotypic assays, we used 23 isofemale lines of *Drosophila melanogaster*  
143 collected in the summer of 2004 and 2005 (Yukilevich & True, 2008b). The origins of the  
144 *Drosophila* are as follows (TABLE 1; FIGURE 1): Birmingham, AL (lines 1-1 and 1-2);  
145 Selba, AL (lines 2-1 and 2-2); Meridian, MS (lines 3-1 and 3-2); Thomasville, GA (lines  
146 4-1 and 4-2); Tampa Bay, FL (lines 5-1 and 5-2); Sebastian, FL (line 6-1); Freeport,  
147 Grand Bahamas-west (lines 7-1 and 7-2); Bullock's Harbor, Berry Islands (lines 8-1 and  
148 8-2); Cockburn Town, San Salvador (lines 9-1 and 9-2); George Town, Exumas (lines  
149 10-1 and 10-2); Mayaguana, Mayaguana (lines 11-1 and 11-2); Port Au Prince, Haiti  
150 (lines 12-1 and 12-2). Latitude and longitude coordinates can be found in Yukilevich  
151 and True (2008b). All flies were maintained at 25 °C in vials on a standard cornmeal diet  
152 (recipe available upon request) and entrained under a 12hr light:12hr dark regime.

153



| Map Number | Location                        | Line(s) in order of decreasing latitude (N to S) | Line ID#'s (Yukilevich and True, 2008b) |
|------------|---------------------------------|--------------------------------------------------|-----------------------------------------|
| 1          | Birmingham, AL                  | 1-1 and 1-2                                      | 21, 39 and 21, 36                       |
| 2          | Selba, AL                       | 2-1 and 2-2                                      | 20, 28 and 20, 17                       |
| 3          | Meridian, MS                    | 3-1 and 3-2                                      | 24, 2 and 24, 9                         |
| 4          | Thomasville, GA                 | 4-1 and 4-2                                      | 13, 34 and 13, 29                       |
| 5          | Tampa Bay, FL                   | 5-1 and 5-2                                      | 4, 12 and 4, 27                         |
| 6          | Sebastian, FL                   | 6-1                                              | 28, 8                                   |
| 7          | Freeport, Grand Bahamas - West  | 7-1 and 7-2                                      | 33, 16 and 33, 11                       |
| 8          | Bullock's Harbor, Berry Islands | 8-1 and 8-2                                      | 40, 23 and 40, 10                       |
| 9          | Cockburn Town, San Salvador     | 9-1 and 9-2                                      | 42, 23 and 42, 20                       |
| 10         | George Town, Exumas             | 10-1 and 10-2                                    | 36, 9 and 36, 12                        |
| 11         | Mayaguana, Mayaguana            | 11-1 and 11-2                                    | 43, 19 and 43, 18                       |
| 12         | Port Au Prince, Haiti           | 12-1 and 12-2                                    | H, 29 and H, 25                         |

154 TABLE 1: Locations, strain names, and line ID numbers of fly lines used in assays

155 *Egg laying, Hatchability, and Remating Rate Assays*

156 Virgin females were collected from all 23 isofemale lines. Male flies up to one day old  
157 were collected from two lines (lines 1-2 and 11-1) located at polar ends of our  
158 geographical study region. We chose these two lines as sources for male flies based on  
159 clinal distance as well as maximal difference between courtship profiles and physical  
160 characteristics (Yukilevich & True, 2008b) to account for female mate preference, which  
161 has been previously established (Yukilevich & True, 2008a). All flies were collected on  
162 light CO<sub>2</sub> anesthesia and aged for three to four days before entering our assays. We  
163 set up a full factorial experiment in which females from each of the isofemale lines were  
164 crossed with the two lines from which males were collected. Each cross was replicated  
165 15 times.

166

167 All flies were live manipulated using aspirators for the remainder of the phenotypic  
168 assays to avoid any physiological and behavioral effects of CO<sub>2</sub> anesthesia (Badre *et*  
169 *al.*, 2005). Assays lasted 24 days and were conducted in two stages. During the first 10  
170 days (i.e. first stage) female remating rates and egg laying rates were measured over a  
171 10-day period; during the following 14 days (i.e. second stage) hatchability rates were  
172 quantified.

173

174 In the first stage, females were transferred daily by aspirator into new vials with  
175 standard cornmeal fly food and blue food coloring. The dye helped visualize eggs laid  
176 by females without causing any variability in their behavior (Bergland, 2012). The vials  
177 also had 20 uL of a 10% diluted active yeast mixture to stimulate females' reproductive

178 activity. At lights on (i.e. dawn) on the initial day of the first stage, individual females  
179 were aspirated into a vial with two males from either one of the two male lines for  
180 mating. Approximately 90 minutes were allocated for copulation to occur, and all males  
181 were discarded immediately after this time period using an aspirator. Females that did  
182 not mate on the first day did not continue in the assay. Fecundity assays were  
183 conducted daily after the females were transferred into new vials. To assess short-term  
184 and long-term receptivity to remating effects, each individual female was introduced to  
185 two new males of the same genotype from her initial mating on the fourth and eighth  
186 day of the assay. Again we allowed 90 minutes on both remating days for copulations to  
187 occur, and all males were discarded via aspirator thereafter.

188  
189 Incorrectly sexed vials in which the female - instead of the male - were accidentally  
190 discarded were not included in later analysis. Remaining vials that passed the first stage  
191 of the experiment were monitored daily for fly eclosion. Flies that eclosed were recorded  
192 and discarded immediately. Fly eclosion monitoring ended when either (a) three  
193 consecutive days of zero fly eclosions occurred or (b) 14 days of monitoring was  
194 reached - whichever occurred first. All phenotyping assays during the first and second  
195 stages were conducted within the first three hours of lights on (i.e dawn). All flies from  
196 the first stage and eclosing vials in the second stage were incubated at a controlled 25  
197 °C with a light timer set for a 12hr light: 12hr dark regime.

198  
199 *Longevity Assays*

200 Female flies used in our longevity assays come from (arranged from north to south)

201 Selba, Alabama, USA (line 2-2), Thomasville, Georgia, USA (line 3-1), Freeport, Grand  
202 Bahamas-west (line 7-2), Bullock's Harbor, Berry Islands (line 8-1), and Port Au Prince,  
203 Haiti (line 12-2). Representative 'American' and 'Caribbean' males were derived lines  
204 originating from the same male collection lines used in egg laying, hatchability, and  
205 remating assays, Birmingham, Alabama, USA (line 1-2) and Mayaguana, Mayaguana  
206 (line 11-1), respectively. 'Homotypic' crosses were defined as male and female both of  
207 either American or Caribbean origin (i.e. American x American or Caribbean x  
208 American). "Heterotypic" crosses were defined as male and female from different origins  
209 (i.e. American x Caribbean or Caribbean x American). Males and females from the  
210 same origin were assumed to be more related and genetically similar to each other than  
211 those from different origins based on previous evidence (Yukilevich & True, 2008b).  
212  
213 Virgin females were collected on light CO<sub>2</sub> anesthesia and aged singly in vials for four  
214 days. Males were collected in the same manner and aged in groups of five per vial. We  
215 performed crosses in two separate rounds, which lasted approximately 70 and 80 days.  
216 In the first round, we crossed female flies from Selba, Alabama, USA and Port Au  
217 Prince, Haiti to either our representative 'American' or 'Caribbean' male. There were 50  
218 replicates for each unique cross. Because of the large effect size from our initial round,  
219 we had 25 replicates for each type of cross in the rest of our lines. In each round, aged  
220 female flies were placed with five male flies for 48 hours to ensure mating occurred.  
221 Male flies were discarded using an aspirator after the mating period. Female flies were  
222 then observed on a regular basis five days per week. Dates of deaths were recorded  
223 until the end of the 70 and 80-day observation periods. The females were transferred to

224 fresh vials every seven days.

225

226 *Post-mating behavior data analysis*

227 We examined the effects of geographic location on the total number of eggs laid by  
228 females, the total hatchability of those egg laid, and the propensity of females to remate  
229 three and seven days after initial mating day. For egg laying and hatchability, we used  
230 ANOVA to test the effects of latitude and longitudinal coordinates (i.e. geographic  
231 position effects). We also used the male and female identity and phenotyping blocks to  
232 account for the variation from genotypes of male and females in addition to  
233 experimental block effects.

234

235 Because remating was scored as a binary variable of whether or not the female  
236 copulated on the two remating days, we used logistic regression models to assess the  
237 effects of geographic location while controlling for male and female genotypes and block  
238 effects on short- and long-term female receptivity to remating. The significance of  
239 longitudinal and latitudinal coordinates and model fits were assessed using analysis of  
240 deviance tables.

241

242 We performed a permutation test to investigate the significance of the lower hatchability  
243 rates in the three central locations as revealed by logistic regression models as well as  
244 through visual confirmation of plots. We calculated the difference in hatchability  
245 between the five lines from our three central locations and the hatchability of all other fly  
246 lines (18 lines). We then randomly assigned fly lines into groups of 5 and 18 and

247 calculated the difference in hatchability between these two groups. These permutations  
248 were repeated 10,000 times. P-values were calculated by the number of times the  
249 difference in hatchability between these two groups were equal to or greater than our  
250 observed value divided by our 10,000 permutations. The line with the lowest  
251 hatchability was removed for a follow-up permutation test to confirm that the lower  
252 hatchability was only due to the effect of one line. Similar permutation tests were  
253 conducted on total egg counts to determine that lower hatchability was also not due to  
254 lower egg counts via ascertainment bias. Hatchability of eggs laid by females mated to  
255 representative 'American' and 'Caribbean' males were performed separately, and P-  
256 values from these tests were corrected using the Bonferroni method.

257

258 All analyses were performed in R and the code for the permutation test is available  
259 upon request.

260

### 261 *Longevity data analysis*

262 Survival analysis is used for temporal data of waiting times to an event with censored  
263 data. We employed methods from survival analysis to examine our data. We analyzed  
264 the waiting times of female death after homotypic or heterotypic mating. Females that  
265 escaped or survived past our observational periods were considered censored data  
266 points. The first step of survival analysis is to estimate survival functions for each of our  
267 crosses,  $S(t)$ , which in our study is the probability of a female living longer than time,  $t$ .  
268 This can be done non-parametrically using the Kaplan-Meier method (Kleinbaum &  
269 Klein, 2012). Parametric models were tested (i.e. exponential, log-normal, log-logistic,

270 and generalized gamma), but none yielded a good fit (data not shown). After survival  
271 curves were fitted, we used it to estimate the cumulative hazard function,  $H(t)$ , for each  
272 type of cross. The cumulative hazard function shows the cumulative probability that a  
273 female has expired up to time,  $t$ .

274

275 The most common statistical test used for comparing survival distributions is the log-  
276 rank test. However, this test has the proportional hazards assumption, which requires  
277 that the hazard functions of the two groups being compared are parallel. Hazard  
278 functions for our comparisons of female longevity after heterotypic and homotypic  
279 matings were plotted and visually checked for the crossing of hazard curves. When  
280 hazard curves cross, the proportional hazards assumption is violated so another test  
281 must be conducted because the standard log-rank test has little to no power (Klein &  
282 Moeschberger, 1997). We chose to use a combined weighted log-rank test, which takes  
283 into account crossing hazard curves (Bathke *et al.*, 2005). This improved log-rank test  
284 has more power than the standard log-rank tests when the hazard functions cross and  
285 the hazard ratio is not proportional.

286

287 All analyses were performed in R using the 'survival' package to estimate the survival  
288 curves and hazard functions. The package 'emplik' was used as part of the improved  
289 log-rank test. The R code can be obtained online  
290 (<http://www.ms.uky.edu/%7Emai/research/LogRank2006.pdf>).

291

292 **Results**

293 *Egg counts*

294 Egg counts for each line were shown using side-by-side boxplots with locations  
295 arranged from the northernmost to the southernmost location, left to right (FIGURE 2A,  
296 2B). It does not appear that egg counts follow a clinal or other geographical pattern for  
297 females mated to representative 'American' or 'Caribbean' males. There is much  
298 variation amongst the lines, but the median egg count for each location is approximately  
299 the same except for when the females from location 6 (line 6-1; Sebastian, FL) were  
300 mated to Caribbean males (FIGURE 2B). The ANOVA model showed that that most of  
301 the variance of egg laying was accounted for by male ( $p = 0.00167$ ) and female  
302 ( $p < 0.0001$ ) genotypes as well as block effects ( $p < 0.0001$ ) and that longitude and  
303 latitude were not significant influences ( $p = 0.32767$ ,  $p = 0.49860$ ). (SUPPLEMENTARY  
304 TABLE 1)

305

306 *Remating*

307 Short- and long-term remating rates for each isofemale line were plotted against latitude  
308 and longitude coordinates (SUPPLEMENTARY FIGURE 1, 2). Short-term remating  
309 rates were generally lower (range of rates : 0-30%) than long-term remating rates  
310 (range of rates: 0-60%). Remating rates do not appear to be influenced by location,  
311 which was investigated further with logistic regression.

312

313 The full logistic regression model evaluating effects of latitude and longitude while  
314 controlling for male and female genotypes and block effects found that latitude ( $p =$   
315 0.11) or longitude ( $p = 0.35$ ) were not useful in predicting short-term remating rates with



316 similar results for long-term remating rates (lon  $p = 0.7616$ , lat  $p = 0.6361$ ). Male  
317 genotype was also not a significant influence on short-term or long-term remating rates  
318 ( $p = 0.4848$  and  $p = 0.1240$ ) (SUPPLEMENTAL TABLE 2, 4). The reduced models  
319 removing latitude and longitude as predictors showed that they were not significantly  
320 influencing remating rates (SUPPLEMENTAL TABLE 3, 5). Female identities in both  
321 logistic models for short- and long- term remating rates were significant, giving evidence  
322 that female genotypes could influence remating rates. However, when we fitted a model  
323 for long-term remating rates with a male x female interaction term, results showed that  
324 this interaction term was not significant ( $p = 0.0959$ ) (SUPPLEMENTAL TABLE 6, 7).

325

### 326 *Hatchability*

327 Hatchability for the various locations in the southeast US and Caribbean Islands were  
328 visualized using side-by-side boxplots with locations arranged from the northernmost to  
329 the southernmost location, left to right (FIGURE 2C, 2D). Hatchability in the three  
330 middle locations (location 4, 28, 33) at the border of the southeast US and Caribbean  
331 Islands appear lower than the locations on the edges in both the graphs displaying  
332 hatchability of females mated to American males (FIGURE 2C) and Caribbean males  
333 (FIGURE 2D).

334

335 Our ANOVA model took into account male and female identities and male/female  
336 genotype interactions on hatchability as well as experimental block effects while  
337 assessing influences of longitude and latitude (TABLE 2). Longitude had a significant  
338 effect on hatchability ( $F=3.954$ ,  $p=0.472$ ) while latitude did not ( $F=1.4$ ,  $p = 0.2372$ )

339 further suggesting that geographic location had some influence on hatchability rates as  
340 indicated by the dip in hatchability in FIGURE 2C,D.  
341

342

|             | DF  | Sum Sq  | Mean Sq | F value | P(>F)      |
|-------------|-----|---------|---------|---------|------------|
| Block       | 14  | 2.934   | 0.2096  | 4.688   | <3.22e-08* |
| Female      | 22  | 7.722   | 0.3510  | 7.853   | <2e-16*    |
| Male        | 1   | 0.887   | 0.8869  | 19.844  | 9.84e-06*  |
| Latitude    | 1   | 0.063   | 0.0626  | 1.400   | 0.2372     |
| Longitude   | 1   | 0.177   | 0.1767  | 3.954   | 0.0472*    |
| Female:Male | 22  | 1.298   | 0.0590  | 1.320   | 0.1493     |
| Residuals   | 672 | 30.035  | 0.0447  |         |            |
| Residuals   | 672 | 5097909 |         |         |            |

343 TABLE 2: ANOVA table for hatchability model

344

345 To evaluate the significance of the dip in hatchability rates, we performed permutation  
346 tests as described in our methods section. We found that the hatchability in the middle  
347 three locations was significantly lower than the rates in the surrounding locations  
348 regardless of the female being mated to an American male ( $p < 0.0001$ ) or Caribbean  
349 male ( $p < 0.0001$ ). Results were similar when the location with the lowest hatchability  
350 rate was removed (28: Sebastian, FL, USA) and the permutation tests performed again  
351 (females mated to American male:  $p = 0.0056$ ; females mated to Caribbean male:  $p =$   
352  $0.0272$ ). Similar tests were conducted on egg counts to investigate whether the lower  
353 hatchability was due to lower egg counts (i.e. ascertainment bias from not observing  
354 enough progeny). No significant differences in egg counts between females from the  
355 middle locations and the outer locations were found regardless of whether they were  
356 mated to American males ( $p = 0.3192$ ) or Caribbean males ( $p = 0.7584$ ). The same  
357 results were yielded when we removed the influence of the extremely low middle  
358 location, 28: Sebastian, FL, USA, (mated to American males:  $p=0.3016$ , mated to  
359 Caribbean males:  $p = 1.0$ ). These results suggest a generalizable central location effect  
360 on hatchability.

361

### 362 *Longevity*

363 Five female lines were measured for longevity after experiencing homotypic or  
364 heterotypic matings. The homotypic cross survival curves for females from lines 2-2, 3-  
365 1, and 12-2 were consistently higher than the survival curves of females in heterotypic  
366 crosses (FIGURE 3A, B, E). There were no apparent differences between homotypic  
367 and heterotypic survival curves of females originating from lines 7-2 or 8-1 (Figure 3C,

368 D).

369

370

| Isofemale line | T time of crossing hazards | p-value from improved log rank |
|----------------|----------------------------|--------------------------------|
| 3-1            | 37                         | 0.04096407                     |
| 8-1            | 42                         | 0.4246727                      |
| 7-2            | 40                         | 0.6260448                      |
| 12-2           | 23                         | 0.02706502                     |
| 2-2            | 61                         | 0.3129819                      |

371 TABLE 3: Improved Log-rank Test Results

372 Hazard curves for all crosses and lines revealed non-proportional hazards in almost all  
373 cases of homotypic and heterotypic matings (SUPPLEMENTARY FIGURE 3). Crossing  
374 points of all hazard functions were visually estimated for use in the improved log-rank  
375 tests (TABLE 3). The improved log-rank tests showed evidence that females after  
376 heterotypic matings had shorter lifespans than females in homotypic matings for  
377 females from lines 3-1 and 12-2 ( $p = 0.0410$  and  $p = 0.0271$ ). Although, females of line  
378 2-2 visually displayed a reduced lifespan when involved in heterotypic matings (FIGURE  
379 3A), these results were not significant in our statistical test ( $p = 0.3130$ ).

380

## 381 **Discussion**

382 We examined several potential postmating reproductive barriers including remating  
383 rates, egg laying rates, hatchability, and female longevity that may potentially influence  
384 a system in the early stages of sexual isolation (Yukilevich and True 2008b). Our results  
385 illustrate the possible relationship between reproductive barriers and genetic admixture.

386

### 387 *Genetic admixture likely affects offspring fitness*

388 We observed an interesting hatchability rate ‘valley’ produced by isofemale lines  
389 originating from our three central locations spanning the border of the United States and  
390 the Caribbean Islands (i.e. locations 5, 6, 7). These locations correspond to areas of  
391 high African and European admixture (Kao et al., 2014). This result may highlight the  
392 presence of essential genetic differences between American and Caribbean fly  
393 populations, which could have manifested as an intrinsic postzygotic barrier between  
394 these two populations. This type of evidence is indicative of the presence of Bateson-

395 Dobzhansky-Muller incompatibilities (DMI), which are negative epistatic interactions and  
396 the most common form of intrinsic postzygotic isolation (Presgraves, 2010). A reduction  
397 in the fitness of 'hybrid' offspring here restricts the product of gene flow between  
398 American and Caribbean *D. melanogaster* populations. A more thorough investigation  
399 of these lines and genome sequences are required to confirm the presence of DMIs, but  
400 are beyond the scope of this study.

401

#### 402 *Females evolve resistance to toxic males*

403 We examined female longevity after mating with males that were more or less  
404 genetically related to them, as defined by physical distance, which does correlate with  
405 geographical distance (Kao et al., 2014). These results from the longevity assay were  
406 the inverse of our hatchability assays. Females originating from locations 7 and 8 did  
407 not seem as affected by heterotypic matings compared to females from the northern  
408 and southernmost locations (i.e. locations 2, 3, 12). It is known that male sperm has  
409 toxic effects on females after mating (Rice, 1996) and in response to this game of  
410 sexual conflict (at least in the laboratory), females develop 'resistance' against males  
411 that they coevolve with in the same environment (Arbuthnott *et al.*, 2014). Our findings  
412 not only support this coevolution tactic, but also illustrates that these patterns can  
413 naturally occur outside of the laboratory.

414

#### 415 *Conclusions*

416 Our study of postmating reproductive barriers along with previous investigations into  
417 premating barriers (Yukilevich & True 2008a, b) illustrate that pre- and post-mating



418 barriers could be evolving at the same time and is not necessarily sequential. While our  
419 findings contribute to the ever-growing breadth of knowledge about sexual isolation and  
420 speciation, it also sheds light on the complexity of the interplay between isolating  
421 mechanisms and genetic admixture. Overall our data suggests that long-term  
422 postmating consequences - offspring fitness and female lifespan reduction - are of  
423 greater influence in this particular incipient sexual isolation scenario than when  
424 compared to more immediate postmating behavioral responses such as egg laying and  
425 remating receptivity. We have also observed the very possible effects of admixture at  
426 the border between the United States and Caribbean islands (i.e. locations 5, 6, 7) (Kao  
427 *et al.*, 2014) leading to interesting interactions between partially isolating mechanisms.  
428 Greater genetic admixture in flies originating from this area could promote the lower  
429 hatchability of eggs laid by females from these populations if American and Caribbean  
430 flies are genetically distinct enough to increase the possibility of DMIs occurring  
431 (Gompert *et al.*, 2012). The same genetic admixture could also contribute towards  
432 female hardiness against harm from mating with a wider range of genetically diverse  
433 males, which in turn can compensate for lower hatchability by increasing reproductive  
434 lifespan.

435

436 We did not find any evidence that egg laying rates or remating rates influenced the  
437 reproductive success in a systematic way with regard to these isofemale lines from the  
438 southeast United States and Caribbean Islands. However, the lack of evidence from our  
439 study does not imply that these behaviors in general are not influential postmating  
440 reproductive barriers. Current views of speciation regard the process as a sliding

441 continuum in which speciation can move forward or step back and may even be  
442 arrested at intermediate stages (Seehausen *et al.*, 2014). Depending on the driving  
443 force of speciation, different types of reproductive barriers form at particular stages  
444 (Seehausen *et al.*, 2014). Thus, it may be that these postmating behaviors could be of  
445 importance at other stages in the speciation continuum, in which case, other species in  
446 the *Drosophila* genus may be better candidates to further investigate this question.

447

#### 448 **Acknowledgements**

449 We are grateful to R. Yukilevich for the isofemale lines from the southeast US and  
450 Caribbean Islands. We thank J. Saltz and B. Foley for useful discussions in designing  
451 behavioral assays. Additionally, we thank the numerous undergraduate research  
452 assistants including M. Hom, G. Kaur, M. Grozdanich, B. Kang, S. Walia, S. Ahmed, J.  
453 Ong, C. Kim, W. Liao, B. Mathews, L. Ishida, D. Kuo, and G. Liang who helped with the  
454 remating, egg laying, hatchability, and lifespan assays. We thank F. Zhang for piloting  
455 the lifespan assay as part of his high school summer internship. This work was  
456 supported by two NIH grants, GM102227 and MH091561. The authors of this paper  
457 have no conflicts of interests to declare.

458

#### 459 **Literature Cited**

460

461 Arbuthnott, D., Dutton, E.M., Agrawal, . A.F., & Rundle, H.D. 2014. The ecology of  
462 sexual conflict: ecologically dependent parallel evolution of male harm and female  
463 resistance in *Drosophila melanogaster*. *Ecol. Lett.* 17(2): 221-228.

464

465 Arnqvist, G. & Rowe, L. 2005. *Sexual Conflict*. Princeton, NJ: Princeton University  
466 Press. Print.

467

468 Badre, N. H., Martin, M.E., & Cooper, R.L. 2005. The physiological and behavioral  
469 effects of carbon dioxide on *Drosophila melanogaster* larvae. *Comp. Biochem. Physiol.*  
470 *A. Mol. Integr. Physiol.* 140(3): 363-376.

471

472 Bathke, A., Kim, M., & Zhou, M. 2005. *Combine Multiple Testing by Censored Empirical*  
473 *Likelihood*. Univ. Kentucky, Dept. of Statistics Tech Report.

474

475 Bergland, A.O., Chae, H., Kim, Y., & Tatar, M. 2012. Fine-scale mapping of natural  
476 variation in fly fecundity identifies neuronal domain of expression and function of an  
477 aquaporin. *PLoS Genet.* 8(4): e1002631.

478

479 Bergland, A.O., Tobler, R., Gonzalez, J., Schmidt, P., & Petrov, D. 2014. Secondary  
480 contact and local adaptation contribute to genome-wide patterns of clinal variation in  
481 *Drosophila melanogaster*. bioRxiv doi: <http://dx.doi.org/10.1101/009084>

482

483 Bono, J. & Markow, T.A. 2009. Postzygotic isolation in cactophilic *Drosophila*: larval  
484 viability and life-history traits of *D. mojavensis*/*D. arizonae* hybrids. *J. Evol. Biol.*  
485 22:1387-1395

486

487 Capy, P., David, J., Allemand, R., Carton, Y., Febvay, G., & Kermarec, A. 1986. Genetic  
488 analysis of *Drosophila melanogaster* in the French West Indies and comparison with  
489 pops from other parts of the world. *Genetica* 69:167–176.

490

491 Caracristi, G. & Schlötterer, C.. 2003. Genetic Differentiation between American and  
492 European *Drosophila melanogaster* Populations could be Attributed to Admixture of  
493 African Alleles. *Mol. Biol. Evol.* 20(5): 792-799.

494

495 Chapman, T., Bangham, J., Vinti, G., Seifried, B., Lung, O., Wolfner, M.F., Smith, H.K.,  
496 & Partridge, L. 2003. The sex peptide of *Drosophila melanogaster*: Female post-mating  
497 responses analyzed by using RNA interference. *PNAS*. 100(17): 9923-9928.

498

499 Civetta, A. & Singh, R. 1995. High divergence of reproductive tract proteins and their  
500 association with postzygotic reproductive isolation in *Drosophila melanogaster* and  
501 *Drosophila virilis* group species. *J. Mol. Evol.* 41(6): 1085-1095.

502

503 Coyne, J.A. & Orr, H.A. 1989. Patterns of Speciation in *Drosophila*. *Evolution*. 43(2):  
504 362-381.

505

506 Coyne, J.A. & Orr, H.A. 2004. *Speciation*. Sunderland, MA: Sinauer Associates. Print.

507

508 Cozzolino, S. & Scopece, G. 2008. Specificity in pollination and consequences for

509 postmating reproductive isolation in deceptive Mediterranean orchids. *Philos. Trans. R.*  
510 *Soc. Lond. B. Biol. Sci.* 363(1506): 3037-3046.

511

512 Duchen P., Zivkovic, D., Hutter, S., Stephan, W., & Laurent, S. 2013. Demographic  
513 Inference reveals African and European admixture in the North American *Drosophila*  
514 *melanogaster* population. *Genetics*. 193(1): 291-301.

515

516 Endler, J.A. 1977. Geographic variation, speciation, and clines. *Monogr. Popul. Biol.* 10:  
517 1–246.

518

519 Fowler, K. & Partridge, L. 1989. A cost of mating in female fruit flies. *Nature*. 338(6218):  
520 760-761.

521

522 Gompert, Z., Lucas, L.K., Nice, C.C., Fordyce, J.A., Forister, M.L., & Buerkle, C.A.  
523 2012. Genomic regions with a history of divergent selection affect fitness of hybrids  
524 between two butterfly species. *Evolution*. 66(7):2167-2181.

525

526 Harrison, R.G. 1990. Hybrid zones: windows on evolutionary process. *Oxford Surv.*  
527 *Evol. Biol.* 7: 69-128.

528

529 Harrison, R.G. 1993. *Hybrid zones and the evolutionary process*. Oxford University  
530 Press, USA. Print.

531

532 Holland, B. & Rice, W.R. 1998. Perspective: chase-away sexual selection: antagonistic  
533 seduction versus resistance. *Evolution* 52: 1-7.

534

535 Hollocher H., Ting, C., Pollack, F. & Wu, C. 1997. Incipient Speciation by Sexual  
536 Isolation in *Drosophila melanogaster*: Variation in Mating Preference and Correlation  
537 Between Sexes. *Evolution*. 51(4): 1175-1181.

538

539 Huxley, J. 1938. Clines: an Auxiliary Taxonomic Principle. *Nature Publishing Group*.  
540 142(3587): 219–220.

541

542 Jiggins, C.D. & Mallet, J. 2000. Bimodal hybrid zones and speciation. *TREE* 15: 250-  
543 255.

544

545 Johnstone R.A. & Keller, L. 2000. How Males Can Gain by Harming Their Mates:  
546 Sexual Conflict, Seminal Toxins, and the Cost of Mating. *Am. Nat.* 156(4): 368-377.

547

548 Kao J. Y, Zubair, A., Salomon, M.P., Nuzhdin, S.V., & Campo, D. 2014. Population  
549 genomic analysis uncovers African and European admixture in *Drosophila*  
550 *melanogaster* populations from the southeastern United States and Caribbean Islands.  
551 *Mol Ecol*. In Press.

552

553 Klein, J.P. & Moeschberger, M.L. 1997. *Survival Analysis*. New York: Springer. Print.

554

- 555 Kleinbaum, D.G. & Klein, M. 2012. *Survival Analysis*. New York: Springer. Print.
- 556
- 557 Martin, O.Y. & Hosken, D.J. 2003. The evolution of reproductive isolation through  
558 sexual conflict. *Nature* 423(6943): 979-982.
- 559
- 560 Parker, G.A. 1979. Sexual selection and sexual conflict. *Sexual selection and*  
561 *reproductive competition in insects*. New York: Academic Press. Print.
- 562
- 563 Presgraves, D.C. 2010. The molecular evolutionary basis of species formation. *Nat.*  
564 *Rev. Genet.* 11: 175-180.
- 565
- 566 Ramsey, J., Bradshaw, Jr., H.D., & Schemskel, D.W. 2003. Components of  
567 Reproductive Isolation between the Monkeyflowers *Mimulus Lewisii* and *M. Cardinalis*  
568 (Phrymaceae). *Evolution* 57(7): 1520-1534.
- 569
- 570 Rice, W.R. 1996. Sexually antagonistic male adaptation triggered by experimental  
571 arrest of female evolution. *Nature* 381: 232-234.
- 572
- 573 Rowe L. & Arnqvist, G. 2002. Sexually antagonistic coevolution in a mating system:  
574 combining experimental and comparative approaches to address evolutionary  
575 processes. *Evolution* 56(4): 754-767.
- 576
- 577 Rowe L., Cameron, E., & Day, T. 2003. Detecting sexually antagonistic coevolution with

578 population crosses. *Proc. Biol. Sci.* 270(1528): 2009-2016.

579

580 Seehausen, O., Butlin, R.K., Keller, I.Wagner, C.E., Boughman, J.W., Hohenlohe, P.A.

581 *et al.* 2014. Genomics and the origin of species. *Nat. Rev. Genet.* 15: 176-192.

582

583 Wolfner M.F. 1997. Tokens of love: Functions and regulation of *Drosophila* male

584 accessory gland products. *Insect Biochem. Mol. Biol.* 27(3): 179-192.

585

586 Yukilevich R. & True, J.R. 2008a. Incipient sexual isolation among cosmopolitan

587 *Drosophila melanogaster* populations. *Evolution* (a) 62(8): 2112-2121.

588

589 Yukilevich R. & True, J.R. 2008b. African Morphology, Behavior and Phermones

590 Underlie Incipient Sexual Isolation between US and Caribbean *Drosophila*

591 *melanogaster*. *Evolution* (b) 62(11): 2807-2828.

592

593 Yukilevich R, Turner TL, Aoki F, Nuzhdin SV, True JR (2010) Patterns and Processes of

594 Genome-Wide Divergence Between North American and African *Drosophila*

595 *melanogaster*. *Genetics*, **186**, 219–239.



596 **Figures and Legends**

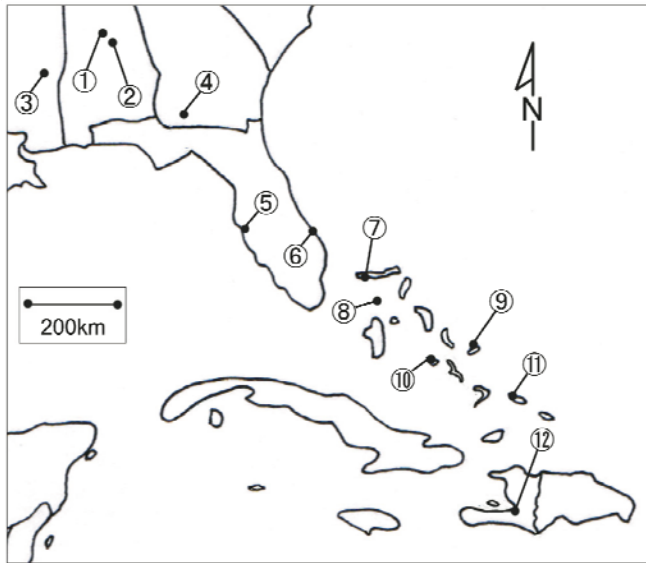

597

598 FIGURE 1: Map of locations used in postmating assays with numbers corresponding to

599 those of Table 1.

600

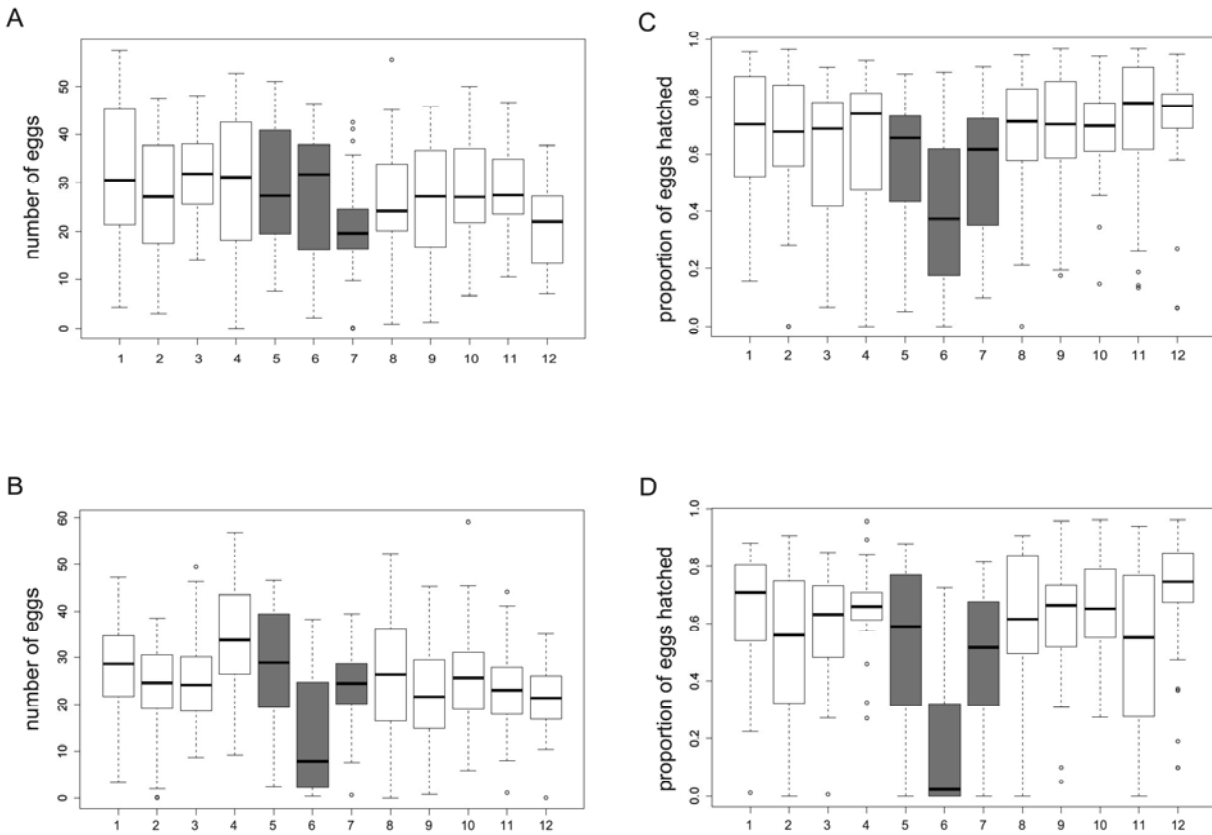

601  
602 FIGURE 2: Egg counts of females mated with A) American males and B) Caribbean  
603 males. Hatchability of females mated with C) American males and D) Caribbean males.  
604 Each box plot is a isofemale line arranged from the northernmost location (left) to the  
605 southernmost location (right). Numbers on the X-axis correspond to those of Table 1.

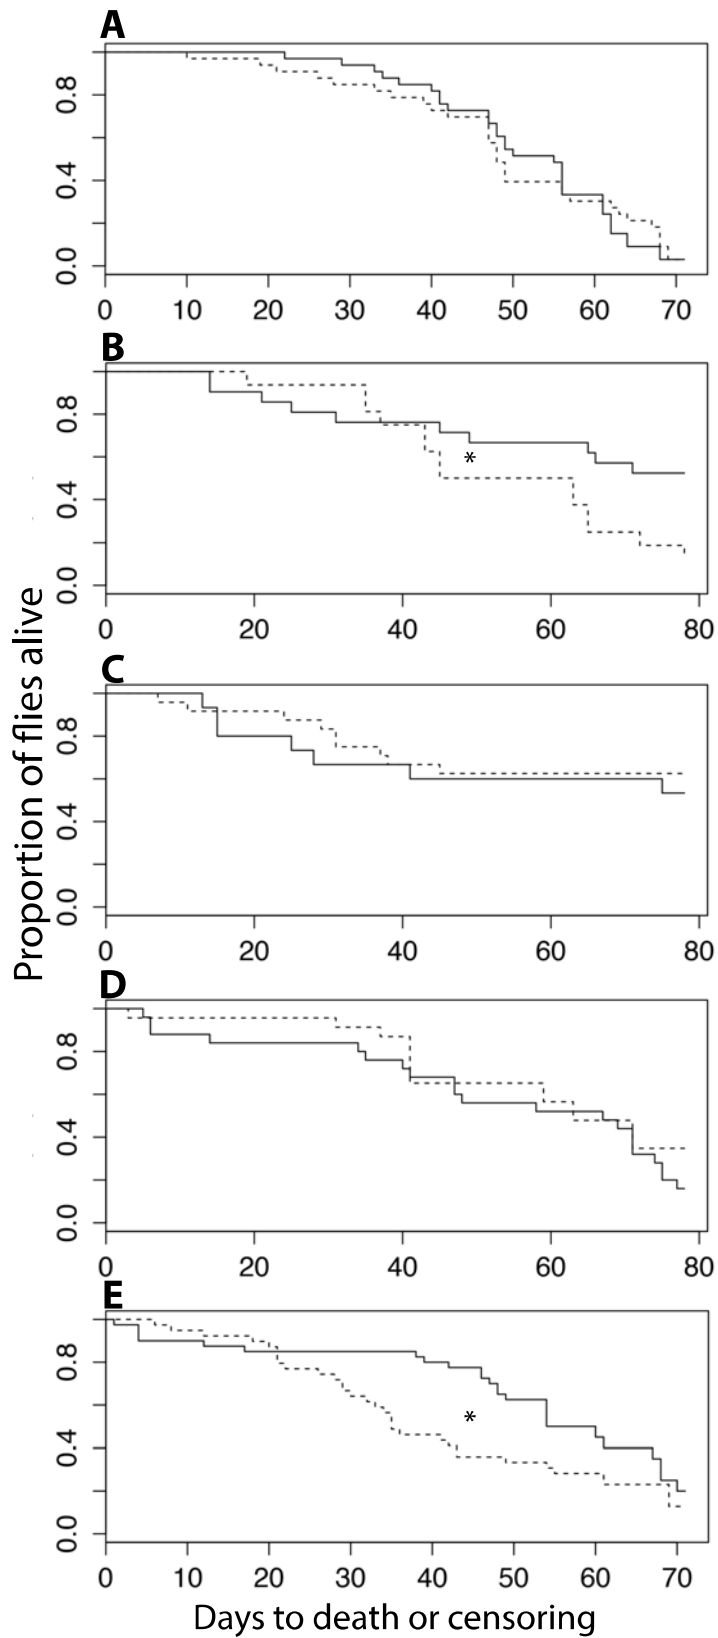

606

607 FIGURE 3: Survival curves of females of isofemale lines A) 2-2, B) 3-1, C) 7-2, D) 8-1,  
608 E) 12-2 after experiencing homotypic (solid line) or heterotypic (dashed line) matings. \*

609 indicates significant p-value < 0.05

610

611
